# Supplementary material for: Design and Prestudy Assessment of a Dashboard for Presenting Self-Collected Health Data of Patients With Diabetes to Clinicians: Iterative Approach and Qualitative Case Study
Source: PubMed Central journal article supplement (PMC6647758; doi:10.2196/14002), 2019-07-09
Supplement: diabetes_v4i3e14002_app1.pdf [file diabetes_v4i3e14002_app1.pdf]

| Role           | Q1  | Q1b                                                                                                                                                            | Q2  | Q2b                                                                                                                                                                        | Q3  | Q3b                                                                             | Q4                                                                                                                                                                                                                                                                      |
|----------------|-----|----------------------------------------------------------------------------------------------------------------------------------------------------------------|-----|----------------------------------------------------------------------------------------------------------------------------------------------------------------------------|-----|---------------------------------------------------------------------------------|-------------------------------------------------------------------------------------------------------------------------------------------------------------------------------------------------------------------------------------------------------------------------|
| Dietitian      | Yes | Useful for patients <i>who have Android phones</i> and are technologically interested only.                                                                    | Yes | Possibility to use the system to define and write goals. More detailed insulin to carbohydrates ratio at different times of the day (breakfast, lunch, afternoon, evening) | Yes | Active Insulin Carbohydrates on Board                                           | Match between time for insulin and time for carbohydrates intakes                                                                                                                                                                                                       |
| Diabetes Nurse | Yes | I think the system will be useful, but I have few consultations per day. This is a good option for users who like to use mobile application for registrations. | No  | <i>Patients would like to enter non-diabetes related drugs taken at fixed time, and this could be automatic and/or easy to enter</i>                                       | No  | Not now                                                                         | <i>Have patients' opportunity to write the type of carbohydrates they eat (the amount may not be always enough)</i><br>This solution may be good for everyone, and especially for patients living at long distances and for patients who follow technology development. |
| Diabetes Nurse | Yes | <i>The Diabetes Diary can replace written diary.</i><br>Several patients use other apps today and are used to them and their functionalities                   | No  | I think the system can be time consuming. No more information should be added now.                                                                                         | No  | -                                                                               | When hovering over the carbohydrates registration show what the patients have eaten.                                                                                                                                                                                    |
| Diabetes Nurse | Yes | -                                                                                                                                                              | Yes | Insulin type.                                                                                                                                                              | No  | Need experience to answer this                                                  | Notes from the consultation should be possible to add to the diary                                                                                                                                                                                                      |
| GP             | Yes | Only for patients who are a bit concerned about their diabetes                                                                                                 | No  | -                                                                                                                                                                          | No  | -                                                                               | Must use the system to be evaluated again.                                                                                                                                                                                                                              |
| Diabetes Nurse | Yes | It depends if the patient has entered enough data.                                                                                                             | Yes | Would like to have the distribution of slow and fast acting insulin.                                                                                                       | No  | Don't know yet, but I think I'm going to use the Combined data Section the most | What about different colors on the bar for slow-acting and fast acting insulin?<br>On the overview, display blood glucose above 15 mmol/L and under severe hypos (under 2.8 mmol/L) in a separate body.                                                                 |
| GP             | Yes | -                                                                                                                                                              | Yes | Blood Pressure                                                                                                                                                             | No  | -                                                                               | Desire to insert lipids                                                                                                                                                                                                                                                 |
| GP             | Yes | -                                                                                                                                                              | No  | -                                                                                                                                                                          | No  | -                                                                               | -                                                                                                                                                                                                                                                                       |
| GP             | Yes | -                                                                                                                                                              | No  | -                                                                                                                                                                          | No  | -                                                                               | <i>Have the possibility to register data automatically directly from Strava, blood glucose devices, insulin pen etc.</i>                                                                                                                                                |
| GP             | Yes | -                                                                                                                                                              | Yes | Plasma glucose                                                                                                                                                             | No  | -                                                                               | -                                                                                                                                                                                                                                                                       |
| GP             | Yes | -                                                                                                                                                              | No  | -                                                                                                                                                                          | No  | -                                                                               | -                                                                                                                                                                                                                                                                       |
| GP             | Yes | Can motivate new patients to join in                                                                                                                           | No  | -                                                                                                                                                                          | No  | -                                                                               | -                                                                                                                                                                                                                                                                       |
| GP             | Yes | -                                                                                                                                                              | No  | -                                                                                                                                                                          | No  | -                                                                               | -                                                                                                                                                                                                                                                                       |
| GP             | Yes | -                                                                                                                                                              | No  | -                                                                                                                                                                          | No  | Do not know yet                                                                 | -                                                                                                                                                                                                                                                                       |

- Q1: Do you think the system will be useful during consultation? Q1b: Potential comments
- Q2: Would you like to have more information delivered by the FullFlow system? Q2b: Potential comments
- Q3: Would you like to remove or hide information delivered by the FullFlow system today? Q3b: Potential comments
- Q4: Do you have any feedback you would like to give to us?

*Comments in green concern the Diabetes Diary only and are outside of the scope or the article.*
