# Supplementary material for: Design and Prestudy Assessment of a Dashboard for Presenting Self-Collected Health Data of Patients With Diabetes to Clinicians: Iterative Approach and Qualitative Case Study
Source: PubMed Central journal article supplement (PMC6647758; doi:10.2196/14002), 2019-07-09

Example of the graphical interface with different data types. Differences with the screenshots provided within the article:

- 1) Concerns T2D patient with oral medication, blood pressure and weight;
- 2) Low data quality;
- 3) Unregistered data type (Lipids) – manually generated;
- 4) No Hba1c due to too low number of blood glucose registrations;

**Overview (from 05/03/2019 to 12/03/2019)**

**Data Reliability**

ⓘ The quality of the self-collected health data seems uncertain: a significant number of issues are presents.  
[Hide/Show details](#)

**Data Summary**

| Data List                         |                   |                                 |               |                           |
|-----------------------------------|-------------------|---------------------------------|---------------|---------------------------|
| Data Type                         | Number of Records | Average Daily Number of Records | Average Value | Pooled Standard Deviation |
| 🔗 Lipids measurement              | 1 records         | 0.12 records                    | 6.25 lipids   | -- lipids                 |
| ⚗ Medication                      | 15 records        | 1.88 records                    | 1593.75 mg.   | -- mg.                    |
| 🩸 Glucose [Moles/volume] in Blood | 10 records        | 1.25 records                    | 7.77 mmol/L   | -- mmol/L                 |
| 🍷 Calories                        | 15 records        | 1.88 records                    | 2475.0 cal    | -- cal                    |
| ⚖ Weight                          | 3 records         | 0.38 records                    |               |                           |
| ❤ Blood pressure                  | 1 records         | 0.12 records                    | -- mmHg       | -- mmHg                   |
| 🚴 Active Physical Activity        | 3 records         | 0.38 records                    | 16.25 Min     | -- Min                    |

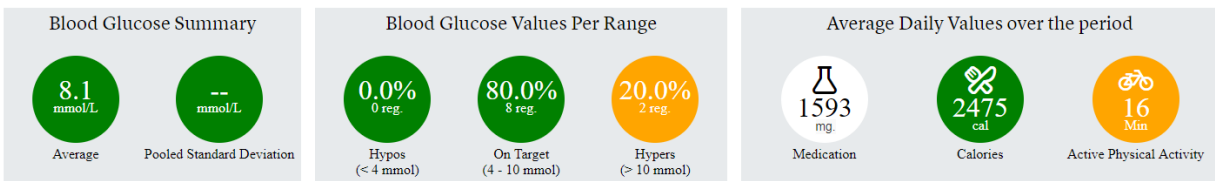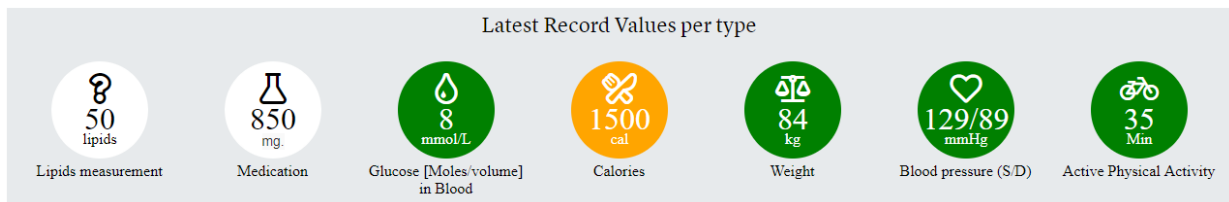

Supplement: diabetes_v4i3e14002_app2.pdf [file diabetes_v4i3e14002_app2.pdf]
